# Supplementary material for: When the inhibitor tells more than the substrate: the cyanide-bound state of a carbon monoxide dehydrogenase
Source: Royal Society of Chemistry journal article supplement (doi:10.1039/c5sc04554a), 2016-01-01
Supplement: c5sc04554a1.pdf [file c5sc04554a1.pdf]

## When the Inhibitor Tells More than the Substrate: the Cyanide-Bound State of a Carbon Monoxide Dehydrogenase

Alexandre Ciaccafava,<sup>a†</sup> Daria Tombolelli,<sup>a†</sup> Lilith Domnik,<sup>b</sup> Jochen Fessler,<sup>b</sup> Jae-Hun Jeoung,<sup>b</sup> Holger Dobbek,<sup>b</sup> Maria Andrea Mroginski,<sup>a\*</sup> Ingo Zebger,<sup>a\*</sup> Peter Hildebrandt<sup>a</sup>

**Table S1. Statistics on Data collection and structure refinement.**

|                                                                      | -320 mV<br>CN <sup>-</sup> - soaked |
|----------------------------------------------------------------------|-------------------------------------|
| <b>Data collection</b>                                               |                                     |
| X-ray source                                                         | Beamline 14.1,<br>BESSY II          |
| Wavelength (Å)                                                       | 0.91841                             |
| Space group                                                          | C2                                  |
| Cell dimensions                                                      |                                     |
| <i>a</i> , <i>b</i> , <i>c</i> (Å)                                   | 112.2, 75.5, 71.2                   |
| $\alpha$ , $\beta$ , $\gamma$ (°)                                    | 90.0, 111.5, 90.0                   |
| Total / unique reflections                                           | 594,333 / 159,430                   |
| <i>R</i> <sub>meas</sub> (%) <sup>a</sup>                            | 6.2 (61.7)                          |
| Resolution (Å)                                                       | 40.764 – 1.23<br>(1.235 – 1.229)    |
| Completeness (%)                                                     | 99.4 (98.5)                         |
| <i>I</i> / $\sigma I$                                                | 14.55 (2.44)                        |
| <b>Refinement</b>                                                    |                                     |
| <i>R</i> <sub>work</sub> / <i>R</i> <sub>free</sub> (%) <sup>b</sup> | 11.77 / 14.67                       |
| protein molecules in the ASU                                         | 1                                   |
| Ramachandran – statistics (%)                                        |                                     |
| preferred / allowed / disallowed                                     | 96.3 / 3.2 / 0.5                    |
| Rms deviation from ideal geometry                                    |                                     |
| Bond lengths (Å)                                                     | 0.015                               |
| Bond angles (°)                                                      | 1.567                               |
| ESU <sup>c</sup>                                                     | 0.023                               |

Values in parentheses are for highest-resolution shell.

<sup>a</sup> Redundancy independent R-factor (intensities)<sup>1</sup>

<sup>b</sup> The *R*<sub>free</sub> factor was calculated from 5% of the data, which were removed at random before the refinement was carried out.

<sup>c</sup> Estimated overall coordinate error (ESU) based on maximum likelihood.

### Reference

- 1 Diederichs & Karplus (1997), Nature Struct. Biol. 4, 269-275

<sup>a</sup> Technische Universität Berlin, Institut für Chemie, Sekretariat PC 14, D-10623 Berlin, Germany. E-mails: alex.ciacca@gmail.com, andrea.mroginski@tu-berlin.de, ingo.zebger@tu-berlin.de

<sup>b</sup> Humboldt-Universität zu Berlin, Institut für Biologie, Unter den Linden 6, D-10099 Berlin, Germany.

<sup>†</sup> These authors contributed equally.

**Table S2. Accuracy of the QM method**

| Wavenumber / cm <sup>-1</sup>        |           |            |                                                        |
|--------------------------------------|-----------|------------|--------------------------------------------------------|
| Sample                               | v(CN)exp. | v(CN)calc. | $\Delta v$ (CN <sub>exp.</sub> - CN <sub>calc.</sub> ) |
| [Fe(CN) <sub>6</sub> ] <sup>4-</sup> | 2037      | 2024       | 13                                                     |
| [Ni(CN) <sub>4</sub> ] <sup>2-</sup> | 2124      | 2118       | 6                                                      |

Calculated vibrational frequency of cyanide stretching on two model compounds and comparison with experimentally assigned peaks in solution. QM: DFT with BP86/def2-TZVP/6-31g\* with RI. Optimization was performed with Turbomole, frequencies were calculated with Gaussian09.
